# Supplementary material for: The Effectiveness of Dog Population Management: A Systematic Review
Source: MDPI journal article supplement (doi:10.3390/ani9121020), 2019-11-22
Supplement: s1 [file s1]

## Supplementary information

**Table S1. Key words and combinations.** The columns represent the key word categories (separated by "AND" in the search) and rows display word variations (separated by "OR" in the search).

| Key word | 1         | 2                         | 3                    | 4            |
|----------|-----------|---------------------------|----------------------|--------------|
|          | AND       |                           | AND                  | AND          |
|          | "Dog"     | Stray*                    | Kill*                | "Population" |
|          | "Dogs"    | "Feral"                   | Cull*                | Control*     |
|          | "Canine"  | Untame*                   | Euthan*              | Restrain*    |
|          | "Canines" | Undomesticat*             | Destroy*             | Constrain*   |
|          |           | "Street"                  | Extermin*            | Limit*       |
|          |           | Free-roam* (free-roaming) | Execut*              | Restrict*    |
|          |           | Roam* (roaming)           | Slaughter*           | Manag*       |
|          |           | Unrestrict*               | Terminat*            | Dynamic*     |
|          |           | Free-rang*                | "Lethal"             | "Ecology"    |
|          |           | Rang*                     | Shelter*             | Demograph*   |
|          |           | Abandon*                  | Rehom*               |              |
|          |           | Unrestrain*               | "Sanctuary"          |              |
|          |           | Unconfin*                 | Adopt*               |              |
|          |           |                           | Rescue centre        |              |
|          |           |                           | Neuter*              |              |
|          |           |                           | Sterili* (sterilise) |              |
|          |           |                           | Infertil*            |              |
|          |           |                           | Fert* (fertility)    |              |
|          |           |                           | Reproduc*            |              |
|          |           |                           | Breed*               |              |
|          |           |                           | Desex*               |              |
|          |           |                           | Castrat*             |              |
|          |           |                           | Contracept*          |              |
|          |           |                           | Birth*               |              |
|          |           |                           | Spay                 |              |

Inter-observer reliability:

The inter-observer reliability check resulted in 97% (146/150) agreement in stage one; and 60% (18/30) agreement at stage two.

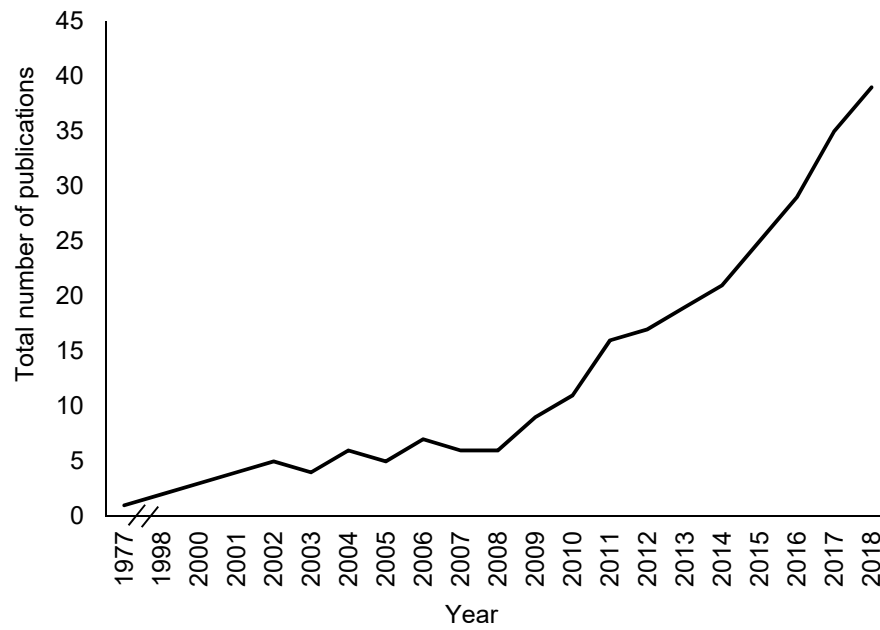

**Figure S1. Cumulative number of publications in the final corpus per year between 1977 and 2018.**  
Note the break in year from 1977 to 1998.

**Table S2. Papers in the final corpus by subject, dog population management method, country, economic status of that country, and funding organisation.**

| <b>Author</b> | <b>Dog population management method</b>                         | <b>Country</b> | <b>Continent</b> | <b>Geographical Region</b> | <b>Economy status*</b> | <b>Funding type/driving organisation**</b> |
|---------------|-----------------------------------------------------------------|----------------|------------------|----------------------------|------------------------|--------------------------------------------|
| [1]           | Neutering (CNR)                                                 | India          | Asia             | Asia                       | Lower middle income    | Charity and University                     |
| [2]           | Neutering (CNR) and Culling (indiscriminate)                    | USA            | North America    | North America              | High income            | Government and University                  |
| [3]           | Neutering (CNR) and neutering (owned) and sheltering (rehoming) | Multiple       | Multiple         | Multiple                   | Multiple               | Government and University                  |
| [4]           | Neutering (owned)                                               | Brazil         | South America    | South America              | Upper middle income    | Charity, Government, and University        |
| [5]           | Neutering (CNR) and sheltering                                  | Italy          | Europe           | European Union             | High income            | Not reported                               |
| [6]           | Neutering (CNR) and sheltering                                  | Brazil         | South America    | South America              | Upper middle income    | Government and University                  |
| [7]           | Culling (indiscriminate)                                        | Multiple       | No specific      | No specific                | No specific            | University                                 |
| [8]           | Neutering (CNR) and sheltering                                  | Canada         | North America    | North America              | High income            | Government and University                  |
| [9]           | Immunocontraceptive & culling (indiscriminate)                  | Multiple       | No specific      | No specific                | No specific            | Government and University                  |

|      |                                                                 |           |               |                 |                     |                                    |
|------|-----------------------------------------------------------------|-----------|---------------|-----------------|---------------------|------------------------------------|
| [10] | Neutering (CNR)                                                 | Brazil    | South America | South America   | Upper middle income | University                         |
| [11] | Sheltering (rehoming)                                           | Turkey    | Europe/Asia   | Europe          | Upper middle income | University                         |
| [12] | Neutering (undefined) and Culling (indiscriminate)              | Cyprus    | Europe        | European Union  | High income         | Government                         |
| [13] | Neutering (CNR)                                                 | India     | Asia          | Asia            | Lower middle income | Charity, Government and University |
| [14] | Neutering (CNR) and neutering (owned) and sheltering (rehoming) | USA       | North America | North America   | High income         | Charity                            |
| [15] | Neutering (CNR)                                                 | Brazil    | South America | South America   | Upper middle income | Charity, Government and University |
| [16] | Neutering (CNR)                                                 | India     | Asia          | Asia            | Lower middle income | Charity                            |
| [17] | Neutering (CNR) and sheltering                                  | Italy     | Europe        | European Union  | High income         | Government and University          |
| [18] | Culling (indiscriminate)                                        | China     | Asia          | Asia            | Upper middle income | Government and University          |
| [19] | Sheltering                                                      | Spain     | Europe        | European Union  | High income         | Government                         |
| [20] | Neutering (owned) and owned dog confinement                     | Mexico    | South America | Central America | Upper middle income | University                         |
| [21] | Neutering (CNR) and Culling (indiscriminate)                    | Sri Lanka | Asia          | Asia            | Upper middle income | Government                         |

|      |                                                       |             |               |                |                       |                           |
|------|-------------------------------------------------------|-------------|---------------|----------------|-----------------------|---------------------------|
| [22] | Culling (indiscriminate)                              | No specific | No specific   | No specific    | No specific           | University                |
| [23] | Taxation                                              | No specific | No specific   | No specific    | No specific           | University                |
| [24] | Culling (infected dogs)                               | Brazil      | South America | South America  | Upper middle income   | Government and University |
| [25] | Neutering (undefined) & Sheltering                    | Thailand    | Asia          | Asia           | Upper middle income   | Government and University |
| [26] | Neutering (owned) and Culling (indiscriminate)        | Cyprus      | Europe        | European Union | High income           | Government                |
| [27] | Neutering (CNR) & Sheltering (transportation of dogs) | Serbia      | Europe        | Europe         | Economy in transition | University                |
| [28] | Neutering (CNR)                                       | India       | Asia          | Asia           | Lower middle income   | Charity                   |
| [29] | Neutering (CNR)                                       | India       | Asia          | Asia           | Lower middle income   | Government and Charity    |
| [30] | Neutering (owned) and sheltering                      | Canada      | North America | North America  | High income           | Charity and University    |
| [31] | Neutering (CNR)                                       | Bangladesh  | Asia          | Asia           | Lower middle income   | Charity and Government    |
| [32] | Neutering (CNR)                                       | India       | Asia          | Asia           | Lower middle income   | Charity and University    |
| [33] | Neutering (CNR)                                       | India       | Asia          | Asia           | Lower middle income   | Charity and University    |
| [34] | Neutering (CNR)                                       | India       | Asia          | Asia           | Lower middle income   | Charity and University    |
| [35] | Neutering (CNR) and Culling (indiscriminate)          | India       | Asia          | Asia           | Lower middle income   | Charity and University    |

|      |                                |        |               |               |                     |                           |
|------|--------------------------------|--------|---------------|---------------|---------------------|---------------------------|
| [36] | Neutering and waste management | India  | Asia          | Asia          | Lower middle income | University                |
| [37] | Culling (infected dogs)        | Brazil | South America | South America | Upper middle income | Charity and University    |
| [38] | Culling (indiscriminate)       | China  | Asia          | Asia          | Upper middle income | Government and University |
| [39] | Culling (indiscriminate)       | Chad   | Africa        | Africa        | Low income          | Charity and Government    |

\* Economy status defined by The World Bank 2019 country income classification [40].

\*\* Includes funding organisation and author affiliations.

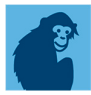

**Table S3. Number (and ratio) of published articles from the final corpus that measure the impact of the management method(s) studied.**

| Impact Measure                             | No. Papers |           |
|--------------------------------------------|------------|-----------|
| Dog Health & Welfare                       |            |           |
| Fertility control                          | 4          | (10.3%)   |
| Fertility control and sheltering           | 1          | (2.6%)    |
| Sheltering                                 | 1          | (2.6%)    |
| Dog Demographics                           |            |           |
| Fertility control                          | 4          | (10.3%)   |
| Fertility control and culling              | 2          | (5.1%)    |
| Fertility control and movement restriction | 1          | (2.6%)    |
| Fertility control and sheltering           | 5          | (12.8%)   |
| Taxation                                   | 1          | (2.6%)    |
| Public Attitude                            |            |           |
| Fertility control                          | 1          | (2.6%)    |
| Fertility control and sheltering           | 2          | (5.1%)    |
| Public Health                              |            |           |
| Culling                                    | 7          | (17.9%)   |
| Fertility control                          | 3          | (7.7%)    |
| Fertility control and culling              | 4          | (10.3%)   |
| Fertility control and sheltering           | 1          | (2.6%)    |
| Sheltering                                 | 1          | (2.6%)    |
| Wildlife                                   |            |           |
| Fertility control                          | 1          | (2.6%)    |
| Total Papers                               |            | 39 (100%) |



**Table S4. Number of papers investigating combinations of dog populations.**

| Dog population under investigation                                          | Number of papers from final corpus investigating dog population |
|-----------------------------------------------------------------------------|-----------------------------------------------------------------|
| Only free-roaming owned dogs                                                | 1 (2.6%)                                                        |
| Only free-roaming unowned dogs                                              | 5 (12.8%)                                                       |
| Free-roaming unowned and free-roaming owned                                 | 19 (48.7%)                                                      |
| Free-roaming unowned, free-roaming owned and restricted owned               | 7 (17.9%)                                                       |
| Free-roaming unowned, free-roaming owned, restricted owned and shelter dogs | 3 (7.7%)                                                        |
| Free-roaming unowned and shelter dogs                                       | 1 (2.6%)                                                        |
| Free-roaming owned and restricted owned                                     | 1 (2.6%)                                                        |
| Undefined                                                                   | 2 (5.1%)                                                        |

**Table S5. Summary of the reporting of study quality indicators in final corpus (excluding modelling studies).** X indicates no metric was reported, ✓ indicates metric was reported and – indicates metric was not applicable for the study type.

| Paper | Reporting of power calculation | Reporting of sample size calculation | Control population included | Reporting of inter-observer reliability | Reporting of baseline characteristics | Reporting quality indicator score |
|-------|--------------------------------|--------------------------------------|-----------------------------|-----------------------------------------|---------------------------------------|-----------------------------------|
| [19]  | X                              | X                                    | X                           | -                                       | X                                     | 0% (0/4)                          |
| [32]  | ✓                              | ✓                                    | ✓                           | -                                       | -                                     | 100% (3/3)                        |
| [28]  | X                              | X                                    | X                           | -                                       | X                                     | 0% (0/4)                          |
| [33]  | X                              | X                                    | X                           | X                                       | ✓                                     | 20% (1/5)                         |
| [34]  | X                              | X                                    | ✓                           | ✓                                       | -                                     | 25% (1/4)                         |
| [31]  | -                              | -                                    | X                           | -                                       | -                                     | 0% (0/1)                          |
| [21]  | X                              | X                                    | X                           | -                                       | ✓                                     | 25% (1/4)                         |
| [6]   | -                              | -                                    | ✓                           | X                                       | ✓                                     | 67% (2/3)                         |
| [1]   | X                              | X                                    | X                           | ✓                                       | ✓                                     | 40% (2/5)                         |
| [16]  | X                              | X                                    | X                           | -                                       | -                                     | 0% (0/3)                          |
| [29]  | X                              | X                                    | X                           | ✓                                       | ✓                                     | 40% (2/5)                         |
| [10]  | ✓                              | ✓                                    | X                           | ✓                                       | ✓                                     | 80% (4/5)                         |
| [11]  | X                              | X                                    | X                           | -                                       | -                                     | 0% (0/3)                          |
| [12]  | X                              | X                                    | X                           | -                                       | ✓                                     | 20% (1/4)                         |
| [26]  | X                              | X                                    | X                           | -                                       | ✓                                     | 20% (1/4)                         |
| [5]   | X                              | X                                    | X                           | -                                       | -                                     | 0% (0/3)                          |
| [30]  | X                              | X                                    | X                           | -                                       | ✓                                     | 20% (1/4)                         |
| [25]  | -                              | -                                    | X                           | -                                       | X                                     | 0% (0/2)                          |
| [8]   | X                              | X                                    | X                           | ✓                                       | -                                     | 20% (1/4)                         |
| [27]  | X                              | X                                    | X                           | -                                       | -                                     | 0% (0/3)                          |
| [15]  | -                              | -                                    | X                           | -                                       | ✓                                     | 50% (1/2)                         |
| [24]  | X                              | X                                    | X                           | -                                       | ✓                                     | 20% (1/4)                         |

|                                                            |     |     |     |     |     |           |
|------------------------------------------------------------|-----|-----|-----|-----|-----|-----------|
| [37]                                                       | X   | X   | ✓   | -   | ✓   | 50% (2/4) |
| Percentage reporting study quality indicators <sup>a</sup> | 11% | 11% | 17% | 71% | 80% |           |

<sup>a</sup> Calculated as a percentage of those studies where this quality indicator is applicable.

## References

1. Airikkala-Otter, I.; Gamble, L.; Mazeri, S.; Handel, I.G.; Bronsvort, B.M. de C.; Mellanby, R.J.; Meunier, N. V Investigation of short-term surgical complications in a low-resource, high-volume dog sterilisation clinic in India. *BMC Vet. Res.* **2018**, *14*, 1–8.
2. Amaku, M.; Dias, R.A.; Ferreira, F. Dynamics and Control of Stray Dog Populations. *Math. Popul. Stud.* **2010**, *17*, 69–78.
3. Santos Baquero, O.; Akamine, L.A.; Amaku, M.; Ferreira, F. Defining priorities for dog population management through mathematical modeling. *Prev. Vet. Med.* **2016**, *123*, 121–127.
4. Santos Baquero, O.; Marconcin, S.; Rocha, A.; Maria Garcia, R. de C. Companion animal demography and population management in Pinhais, Brazil. *Prev. Vet. Med.* **2018**, *158*, 169–177.
5. Barnard, S.; Chincarini, M.; Di Tommaso, L.; Di Giulio, F.; Messori, S.; Ferri, N. Free-roaming dogs control activities in one italian province (2000-2013): is the implemented approach effective? *Maced. Vet. Rev.* **2015**, *38*, 149–158.
6. Belo, V.S.; Struchiner, C.J.; Werneck, G.L.; Teixeira Neto, R.G.; Tonelli, G.B.; de Carvalho Junior, C.G.; Nascimento Ribeiro, R.A.; da Silva, E.S. Abundance, survival, recruitment and effectiveness of sterilization of free-roaming dogs: A capture and recapture study in Brazil. *PLoS One* **2017**, *12*, 1–19.
7. Bhunu, C.P. Impact of culling stray dogs and vaccination on the control of human rabies: a mathematical modeling approach. *Int. J. Biomath.* **2011**, *4*, 379–397.
8. Boey, J. Working with communities to improve the quality of life of British Columbia's free-roaming dogs and their people. Thesis., University of Victoria, 2017.
9. Carroll, M.J.; Singer, A.; Smith, G.C.; Cowan, D.P.; Massei, G. The use of immunocontraception to improve rabies eradication in urban dog populations. *Wildl. Res.* **2010**, *37*, 676–687.
10. Costa, E.D.; Martins, C.M.; Cunha, G.R.; Catapan, D.C.; Ferreira, F.; Oliveira, S.T.; Maria Garcia, R. de C.; Biondo, A.W. Impact of a 3-year pet management program on pet population and owner's perception. *Prev. Vet. Med.* **2017**, *139*, 33–41.
11. Demirbas, Y.S.; Emre, B.; Kockaya, M. Integration ability of urban free-ranging dogs into adoptive families' environment. *J. Vet. Behav. Appl. Res.* **2014**, *9*, 222–227.
12. Economides, P.; Christofi, G. Evaluation of control programmes for echinococcosis/hydatidosis in Cyprus. *Rev. Sci. Tech. L Off. Int. DES Epizoot.* **2000**, *19*, 784–792.
13. Fitzpatrick, M.C.; Shah, H.A.; Pandey, A.; Bilinski, A.M.; Kakkar, M.; Clark, A.D.; Townsend, J.P.; Abbas, S.S.; Galvani, A.P. One Health approach to cost-effective rabies control in India. *Proc. Natl. Acad. Sci. U. S. A.* **2016**, *113*, 14574–14581.
14. Frank, J. An interactive model of human and companion animal dynamics: the ecology and

- economics of dog overpopulation and the human costs of addressing the problem. *Hum. Ecol.* **2004**, *32*, 107–130.
15. Garcia, R.C.M.; Amaku, M.; Biondo, A.W.; Ferreira, F. Dog and cat population dynamics in an urban area: evaluation of a birth control strategy. *Pesqui. Vet. Bras.* **2018**, *38*, 511–518.
  16. Hiby, L.R.; Reece, J.F.; Wright, R.; Jaisinghani, R.; Singh, B.; Hiby, E.F. A mark-resight survey method to estimate the roaming dog population in three cities in Rajasthan, India. *BMC Vet. Res.* **2011**, *7*, 1–9.
  17. Hogasen, H.R.; Er, C.; Di Nardo, A.; Dalla Villa, P.; Høgåsen, H.; Er, C.; Nardo, A. Di; Villa, P.D. Free-roaming dog populations: A cost-benefit model for different management options, applied to Abruzzo, Italy. *Prev. Vet. Med.* **2013**, *112*, 401–413.
  18. Hou, Q.; Jin, Z.; Ruan, S. Dynamics of rabies epidemics and the impact of control efforts in Guangdong Province, China. *J. Theor. Biol.* **2012**, *300*, 39–47.
  19. Jimenez, S.; Perez, A.; Gil, H.; Schantz, P.M.; Ramalle, E.; Juste, R.A. Progress in control of cystic echinococcosis in La Rioja, Spain: decline in infection prevalences in human and animal hosts and economic costs and benefits. *ACTA Trop.* **2002**, *83*, 213–221.
  20. Kisiel, L. Using a dog demography field study to inform the development of an agentbased computer simulation. Evaluating owned dog population control interventions in a small, semi-urban community in Mexico. Thesis., The University of Guelph, 2017.
  21. Kumarapeli, V.; Awerbuch-Friedlander, T. Human rabies focusing on dog ecology-A challenge to public health in Sri Lanka. *ACTA Trop.* **2009**, *112*, 33–37.
  22. Leung, T.; Davis, S.A. Rabies Vaccination Targets for Stray Dog Populations. *Front. Vet. Sci.* **2017**, *4*, 1–10.
  23. Liu, S.; Chen, H. Solving Stray-Animal Problems by Economic Policies. *Taipei Econ. Inq.* **2016**, 1–27.
  24. Melo, S.N.; Teixeira-Neto, R.G.; Werneck, G.L.; Struchiner, C.J.; Ribeiro, R.A.N.; Sousa, L.R.; de Melo, M.O.G.; Carvalho Junior, C.G.; Penaforte, K.M.; Manhani, M.N.; et al. Prevalence of visceral leishmaniasis in A population of free-roaming dogs as determined by multiple sampling efforts: A longitudinal study analyzing the effectiveness of euthanasia. *Prev. Vet. Med.* **2018**, *161*, 19–24.
  25. Panichabhongse, P. The epidemiology of rabies in Thailand. Thesis, Massey University, 2001.
  26. Polydorou, K. The anti-echinococcosis campaign in Cyprus. *Trop. Anim. Health Prod.* **1977**, *9*, 141–146.
  27. Radisavljevic, K.; Vucinic, M.; Becskei, Z.; Stanojkovic, A.; Ostovic, M. Comparison of stress level indicators in blood of free-roaming dogs after transportation and housing in the new environment. *J. Appl. Anim. Res.* **2017**, *45*, 52–55.
  28. Reece, J.F.; Chawla, S.K. Control of rabies in Jaipur, India, by the sterilisation and vaccination of neighbourhood dogs. *Vet. Rec.* **2006**, *159*, 379–383.

29. Reece, J.F.; Chawla, S.K.; Hiby, A.R. Decline in human dog-bite cases during a street dog sterilisation programme in Jaipur, India. *Vet. Rec.* **2013**, *172*, 473–477.
30. Schurer, J.M.; Phipps, K.; Okemow, C.; Beatch, H.; Jenkins, E. Stabilizing Dog Populations and Improving Animal and Public Health Through a Participatory Approach in Indigenous Communities. *Zoonoses Public Health* **2015**, *62*, 445–455.
31. Tenzin, T.; Ahmed, R.; Debnath, N.C.; Ahmed, G.; Yamage, M. Free-Roaming Dog Population Estimation and Status of the Dog Population Management and Rabies Control Program in Dhaka City, Bangladesh. *PLoS Negl. Trop. Dis.* **2015**, *9*, 1–14.
32. Totton, S.C.; Wandeler, A.I.; Ribble, C.S.; Rosatte, R.C.; McEwen, S.A. Stray dog population health in Jodhpur, India in the wake of an animal birth control (ABC) program. *Prev. Vet. Med.* **2011**, *98*, 215–220.
33. Totton, S.C.; Wandeler, A.I.; Zinsstag, J.; Bauch, C.T.; Ribble, C.S.; Rosatte, R.C.; McEwen, S.A. Stray dog population demographics in Jodhpur, India following a population control/rabies vaccination program. *Prev. Vet. Med.* **2010**, *97*, 51–57.
34. Yoak, A.J.; Reece, J.F.; Gehrt, S.D.; Hamilton, I.M. Disease control through fertility control: Secondary benefits of animal birth control in Indian street dogs. *Prev. Vet. Med.* **2014**, *113*, 152–156.
35. Yoak, A.J.; Reece, J.F.; Gehrt, S.D.; Hamilton, I.M. Optimizing free-roaming dog control programs using agent-based models. *Ecol. Modell.* **2016**, *341*, 53–61.
36. Belsare, A. V.; Gompper, M.E. A model-based approach for investigation and mitigation of disease spillover risks to wildlife: Dogs, foxes and canine distemper in central India. *Ecol. Modell.* **2015**, *296*, 102–112.
37. Ashford, D.; David, J.; Freire, M.; David, R.; Sherlock, I.; Da Conceicao, M.; Sampaio, D.; Badaro, R. Studies on control of visceral leishmaniasis: Impact of dog control on canine and human visceral leishmaniasis in Jacobina, Bahia, Brazil. *Am. J. Trop. Med. Hyg.* **1998**, *59*, 53–57.
38. Zhang, J.; Jin, Z.; Sun, G.Q.; Zhou, T.; Ruan, S. Analysis of rabies in China: transmission dynamics and control. *PLoS One* **2011**, *6*, 1–9.
39. Zinsstag, J.; Durr, S.; Penny, M.; Mindekem, R.; Roth, F.; Gonzalez, S.; Naissengar, S.; Hattendorf, J. Transmission dynamics and economics of rabies control in dogs and humans in an African city. *Proc. Natl. Acad. Sci.* **2009**, *106*, 14996–15001.
40. The World Bank - Countries and Economies Available online: <https://data.worldbank.org/country>.
